# Supplementary material
Source: PubMed Central journal article supplement (PMC5380553)
Supplement: NIHMS843059-supplement-1.pdf [file NIHMS843059-supplement-1.pdf]

## Supplemental Figure Legends

**Supplemental Figure 1. Validation of gene for chemoresistance of prostate cancer to DTX.** Total RNA from PC-3 parental and PC-3-TxR cells was subjected to real-time PCR for calbindin1, plac8, runx3 and fzd4. The expression of these genes are inconsistent with the results from gene array data. (n = 3 per group); \*\*,  $P < 0.001$  versus PC-3 parental cells by t test, ns, no significant  $P < 0.05$ .

**Supplemental Figure 2.** Caliper measurements of subcutaneous tumors presented in Figure 5A.

**Supplemental Figure 3. Bone stromal cells decrease LXN expression and induce chemoresistance in LNCaP cells.** LNCaP cells ( $1.5 \times 10^4/\text{ml}$ ) were mixed with LNCaP ( $1.5 \times 10^4/\text{ml}$ ), MC3T3 ( $1.5 \times 10^4/\text{ml}$ ) or ST-2 ( $1 \times 10^4/\text{ml}$ ). (A) The cell mixtures were plated into 6-well plates. After 48 hours, cells were then collected and total mRNA subjected to real-time PCR for LXN and HPRT-1 using human-specific primers. LXN expression was normalized to HPRT-1. \* $P < 0.05$  LNCaP+MC3T3 cells versus LNCaP (t test). # $P < 0.01$  LNCaP+ST-2 cells versus LNCaP cells (t test). (B) The cell mixtures were plated into 96-well plates. After 48 hours, the cells were treated with 16nM docetaxel (DOX) for 48 hours and then subjected to MTS assay. \* $P < 0.05$  LNCaP+MC3T3 cells versus LNCaP cells (t test).

**Supplemental Figure 4. RAW cells do not reduce LXN expression or promote chemoresistance in PC-3 cells.** PC-3-luc cells ( $1.5 \times 10^4/\text{ml}$ ) were mixed with PC-3 ( $1.5 \times 10^4/\text{ml}$ ), MC3T3 ( $1.5 \times 10^4/\text{ml}$ ) or RAW cells ( $1 \times 10^4/\text{ml}$ ). (A) The cell mixtures were plated into 6-well plates. After 48 hours, cells were then collected and total mRNA subjected to real-time PCR for LXN and HPRT-1 using human-specific primers. LXN expression was normalized to HPRT-1. \* $P = 0.0004$  PC-3-luc+MC3T3 cells versus PC-3-luc+PC-3 cells (t test). # $P = 0.012$  PC-3-luc+MC3T3 cells versus PC-3-luc+PC-3 cells (t test). (B) The cell mixtures were plated into white, clear bottom 96-well plates. After 48 hours, the cells were treated with 16nM docetaxel (DOX) for 48 hours and then 20 $\mu\text{l}$  luciferin (40 mg/ml) was added to each well and the cells were incubated at 37°C and 5% CO<sub>2</sub> for 2 minutes. Cell viability was obtained by measuring the luminescence at integration 1000 ms with a plate reader. \* $P = 0.022$  PC-3-luc+MC3T3 cells versus PC-3-luc+PC-3 cells (t test).

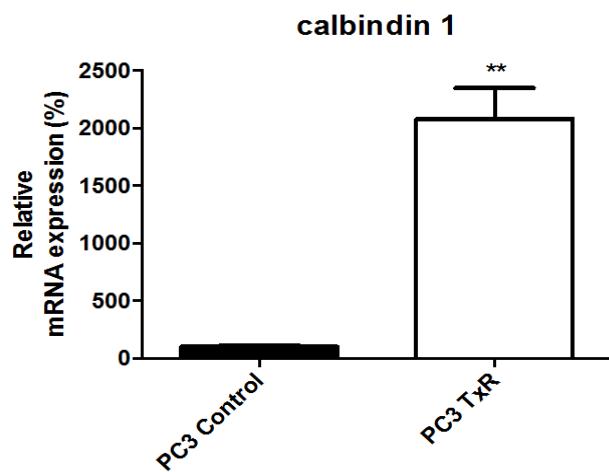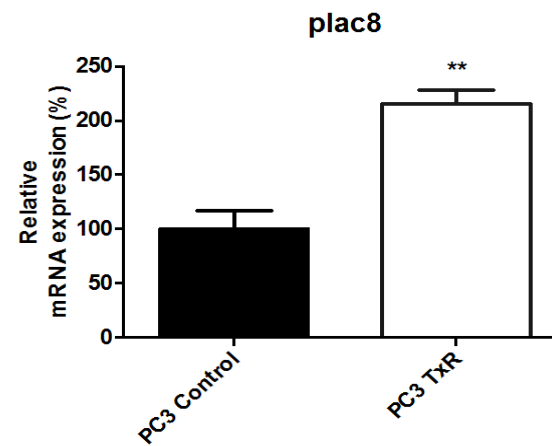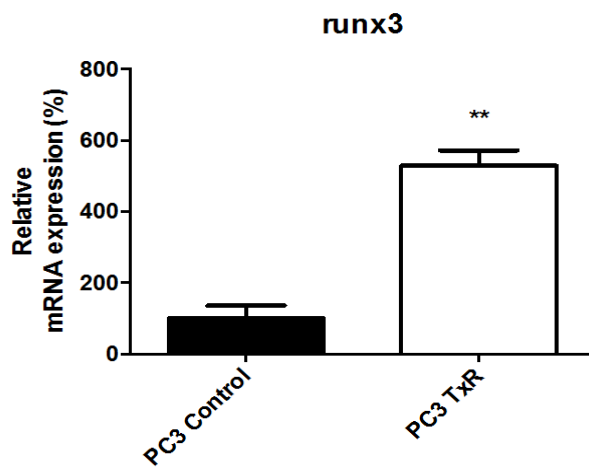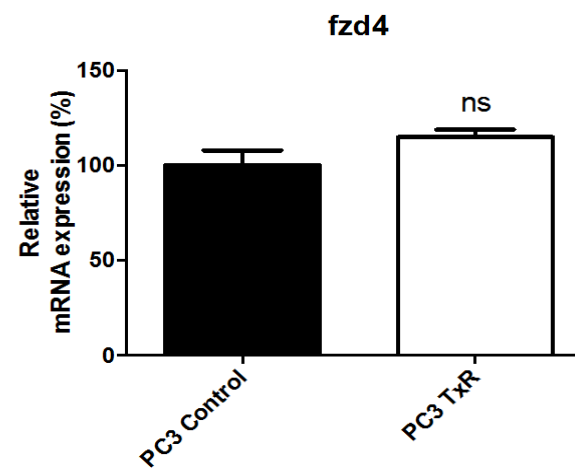

Supplemental Figure 1

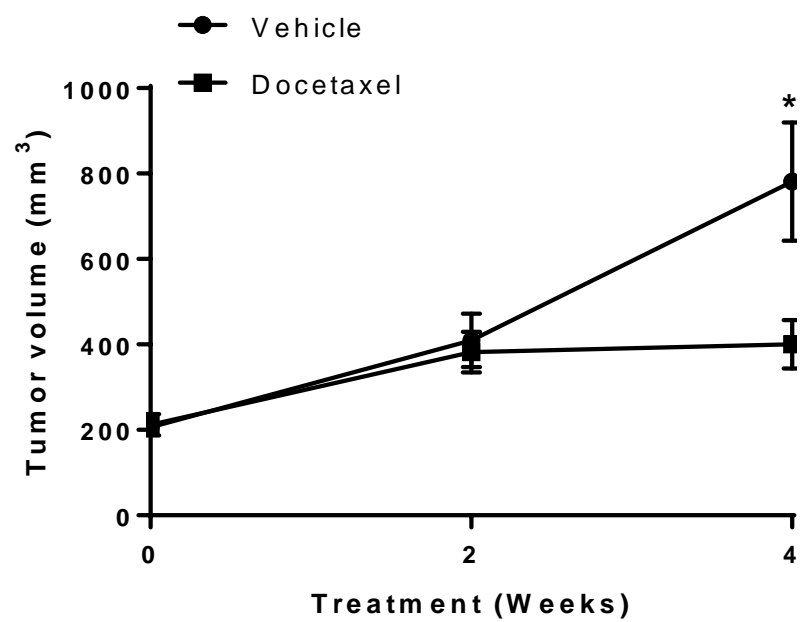

Supplemental Figure 2

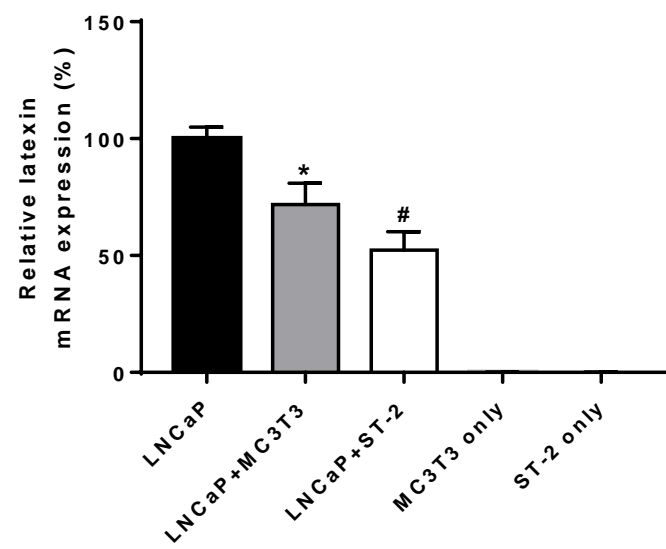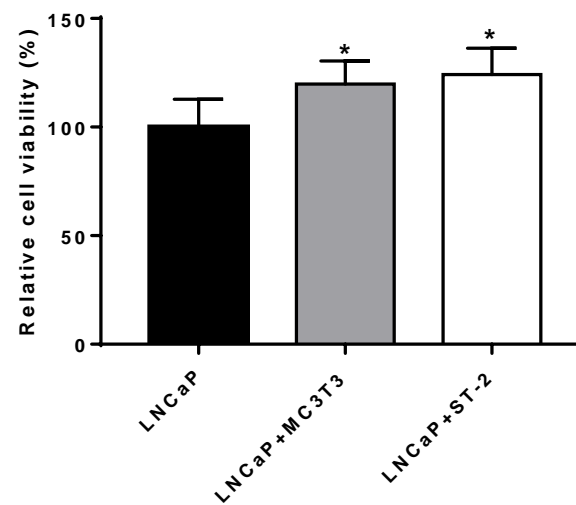

Supplemental Figure 3

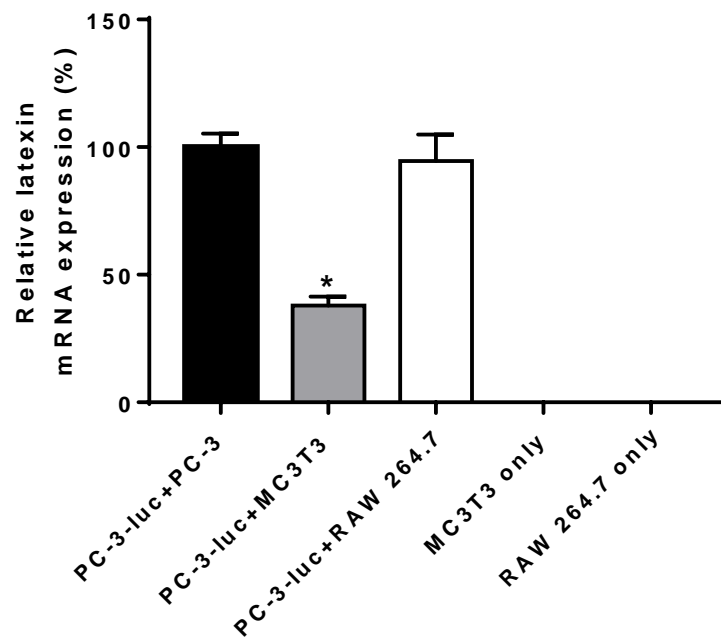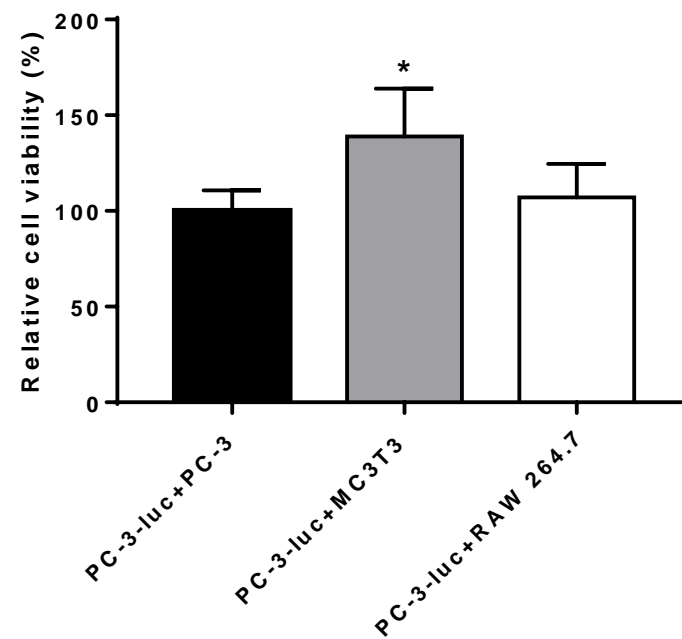

Supplemental Figure 4
